# Supplementary material for: Site-Specific Cleavage of Ribosomal RNA in Escherichia coli-Based Cell-Free Protein Synthesis Systems
Source: PubMed Central journal article supplement (PMC5167549; doi:10.1371/journal.pone.0168764), 2016-12-19

**S1 Table. Calculation of relative protein amounts during cell-free extract processing.**

| Processing step | EF-Tu                              |                     |             | EF-Ts                              |                     |             | EF-G                               |                     |             | RPS1                               |                     |             |
|-----------------|------------------------------------|---------------------|-------------|------------------------------------|---------------------|-------------|------------------------------------|---------------------|-------------|------------------------------------|---------------------|-------------|
|                 | ratio peak areas unlabeled/labeled | relative amount [%] | rel. SD [%] | ratio peak areas unlabeled/labeled | relative amount [%] | rel. SD [%] | ratio peak areas unlabeled/labeled | relative amount [%] | rel. SD [%] | ratio peak areas unlabeled/labeled | relative amount [%] | rel. SD [%] |
| 1               | 5.48                               | 100.00              | 3.28        | 4.94                               | 100.00              | 4.77        | 4.28                               | 100.00              | 4.23        | 5.62                               | 100.00              | 5.87        |
| 2               | 5.21                               | 94.95               | 6.96        | 4.73                               | 95.69               | 6.73        | 4.01                               | 93.82               | 7.79        | 5.21                               | 90.67               | 8.13        |
| 3               | 5.20                               | 94.74               | 6.45        | 4.87                               | 98.55               | 7.78        | 4.15                               | 97.11               | 8.49        | 5.07                               | 88.22               | 7.77        |
| 4               | 4.65                               | 84.80               | 3.34        | 5.06                               | 102.27              | 6.39        | 4.44                               | 103.74              | 2.62        | 5.47                               | 95.29               | 4.17        |
| 5               | 4.48                               | 81.62               | 6.37        | 4.99                               | 100.90              | 7.19        | 4.31                               | 100.73              | 8.58        | 5.22                               | 90.82               | 12.62       |

Ratio of peak areas of unlabeled to labeled peptides give relative protein amount in the sample.

Unlabeled peptide FESEVYILSK (EF-Tu)

+ EIC (607.8217)

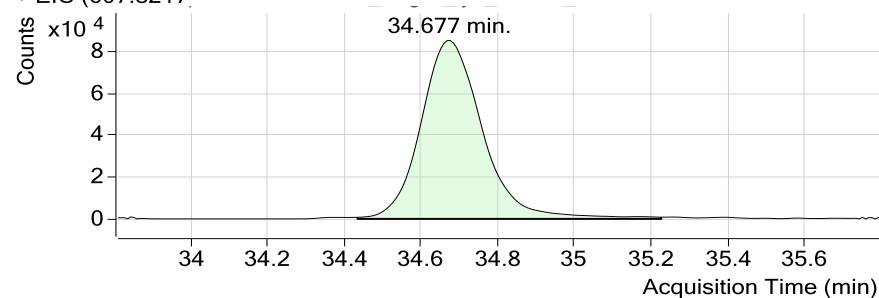

Labeled peptide FESEVYILSK (EF-Tu)

+ EIC (636.4172)

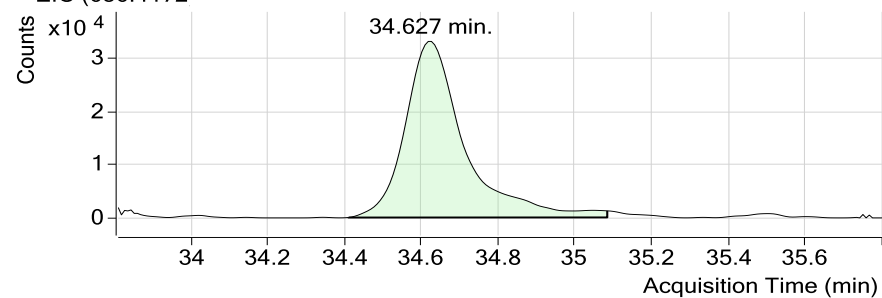

Supplement: pone.0168764.s001.pdf [file pone.0168764.s001.pdf]
