# Supplementary material for: Site-Specific Cleavage of Ribosomal RNA in Escherichia coli-Based Cell-Free Protein Synthesis Systems
Source: PubMed Central journal article supplement (PMC5167549; doi:10.1371/journal.pone.0168764), 2016-12-19
Supplement: pone.0168764.s002.pdf [file pone.0168764.s002.pdf]

**S2 Table: Increase in the ratio of cleaved to intact 16S rRNA after 3 h of in vitro translation reaction with and without spiking of 20 mM Mg<sup>2+</sup>.**

| Reaction conditions       | Ratio of cleaved to intact 16S rRNA |                  | Relative increase [%] |
|---------------------------|-------------------------------------|------------------|-----------------------|
|                           | 2h reaction time                    | 3h reaction time |                       |
| No Mg <sup>2+</sup> spike | 0.23±0.03                           | 0.35±0.06        | 51                    |
| Mg <sup>2+</sup> spike    | 0.18±0.02                           | 0.19±0.02        | 6                     |

The peak areas of cleaved and intact 16S rRNA were determined after 2 and 3 h by CGE-LIF measurements and are shown as ratios. Addition of Mg<sup>2+</sup> reduced the cleavage.
